# Supplementary material for: Identification of Potential Kinase Inhibitors within the PI3K/AKT Pathway of Leishmania Species
Source: MDPI journal article supplement (doi:10.3390/biom11071037), 2021-07-16
Supplement: s1 [file s1]

## **Supplementary Information**

### **Identification of potential kinase inhibitors within the PI3K/AKT pathway of *Leishmania* species**

Rodrigo Ochoa<sup>1,2</sup>, Amaya Ortega-Pajares<sup>3</sup>, Florencia A. Castello<sup>4</sup>, Federico Serral<sup>4</sup>, Darío Fernández do Porto<sup>4,5</sup>, Janny A. Villa-Pulgarin<sup>6</sup>, Rubén E. Varela-M<sup>7</sup>, Carlos Muskus<sup>1</sup>

<sup>1</sup>Programa de Estudio y Control de Enfermedades Tropicales, PECET, Universidad de Antioquia, Medellín 050010, Colombia

<sup>2</sup>Biophysics of Tropical Diseases, Max Planck Tandem Group, University of Antioquia, Medellín 050010, Colombia.

<sup>3</sup>Department of Medicine and Radiology, Peter Doherty Institute, University of Melbourne, Melbourne, VIC, Australia

<sup>4</sup>IC-CONICET, Ciudad Universitaria, Pabellón 2, C1428EHA Ciudad de Buenos Aires, Argentina

<sup>5</sup>Departamento de Química Biológica, Facultad de Ciencias Exactas y Naturales, Universidad de Buenos Aires, Ciudad Universitaria, Pabellón 2, C1428EHA Ciudad de Buenos Aires, Argentina

<sup>6</sup>Grupo de Investigaciones Biomédicas, Facultad de Ciencias de la Salud, Corporación Universitaria Remington, Medellín 050034, Colombia

<sup>7</sup>Grupo de Investigación en Química y Biotecnología (QUIBIO), Facultad de Ciencias Básicas, Universidad Santiago de Cali, Cali 760035, Colombia

## Supplementary Figures

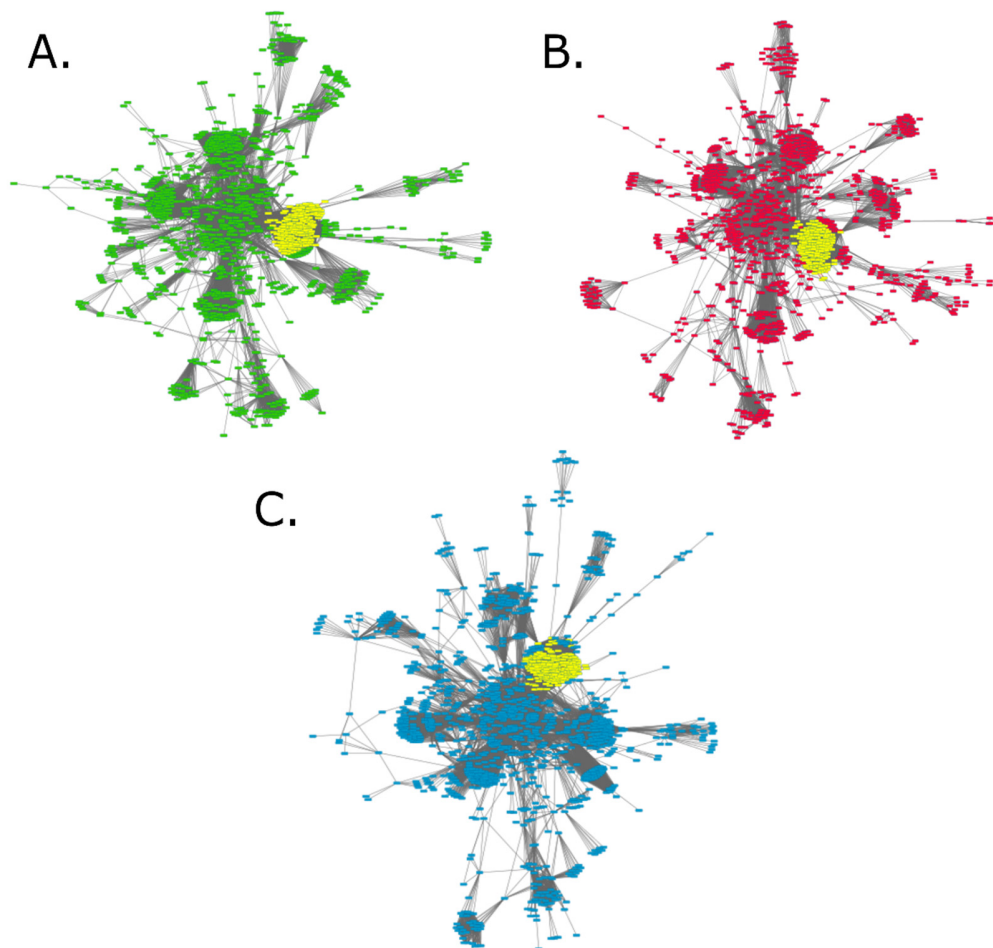

**Figure S1.** Protein-protein interaction networks of (A) *Leishmania major*, (B) *Leishmania braziliensis* and (C) *Leishmania infantum*. The yellow nodes represent the sub-network of proteins with interactions to GSK3, which explain the high connectivity degree the protein has within *Leishmania* spp. pathways.

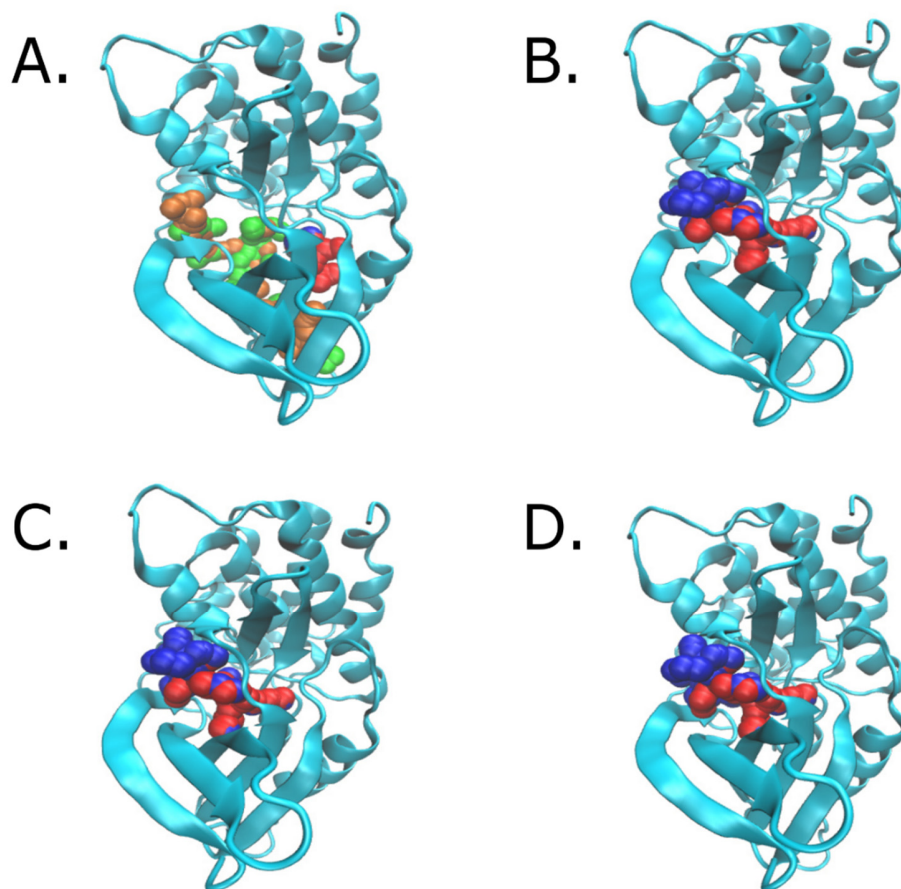

**Figure S2.** Protein structure visualization for CRK in different *Leishmania* strains. (A) *L. major*, (B) *L. mexicana*, (C), *L. infantum*, (D) *L. donovani*. The most druggable pocket is shown. Polar alpha spheres are depicted in red while apolar alpha spheres in blue. Predicted most druggable pockets were equivalent for all the strains analysed except the pocket predicted for the *L. major* CRK structure where the folding forms a new a pocket with higher druggability score. In this case, the equivalent pocket to the most druggable pocket of the other proteins is also shown in green (apolar alpha-spheres) and yellow (polar alpha-spheres).

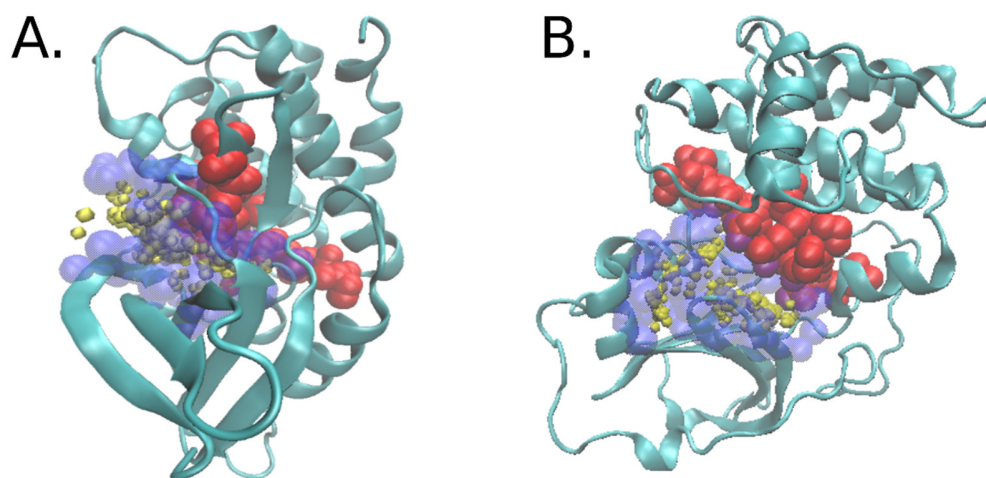

**Figure S3.** Superposition of the reported catalytic site and the predicted pocket for CDK (A) and AKT (B) homologues in *L. braziliensis*. Catalytic residues are depicted in red, pocket residues in blue, and the C- $\alpha$  atoms of the pocket in yellow.

## Supplementary Tables

**Table S1.** List of all the proteins present in the human PI3K/AKT and apoptosis pathways with potential orthologues (UniProtKB IDs) in different *Leishmania* species.

|                     | Cutaneous             |                    | Cutaneous/<br>Mucocutaneous | Cutaneous/<br>Visceral | Visceral              |
|---------------------|-----------------------|--------------------|-----------------------------|------------------------|-----------------------|
| Human gene<br>KEGG* | <i>L. mexicana</i> ID | <i>L. major</i> ID | <i>L. braziliensis</i> ID   | <i>L. infantum</i> ID  | <i>L. donovani</i> ID |
| PHLPP               | E9AZD9                | E9ACV0             | A4HG10                      | A4I329                 | E9BJF5                |
| Rac1                | E9ARM6                | Q4QGD2             | A4HLP5                      | E9AGQ4                 | E9BDR9                |
| MEK                 | E9ASK6                | Q4Q1Z0             | A4HNU6                      | A4ICP8                 | E9BTF2                |
| Rheb                | E9B2Y3                | Q4Q573             | A4HKJ3                      | A4I825                 | E9BNW8                |
| Raptor              | E9AXD8                | Q4QA34             | A4HEF7                      | A4I1A2                 | E9BHG6                |
| AKT                 | E9ARP5                | Q27687             | A4H9L8                      | A4HXY2                 | E9BDT9                |
| GSK3                | E9ARG4                | Q4QE15             | A4H9D1                      | A4HXQ3                 | E9BDK8                |
| AMPK                | E9ALM1                | E9AE64             | A4HHK1                      | A4I4Q9                 | E9BL11                |
| PTEN                | E9B4W8                | Q4Q359             | A4H7T1                      | A4I9V5                 | E9BQV4                |

|               |        |        |        |         |        |
|---------------|--------|--------|--------|---------|--------|
| 14-3-3        | E9ANI1 | Q4QH45 | A4H6F2 | A4HUU6  | E9BAM3 |
| mTOR          | E9AU66 | Q4Q0C8 | A4HBF9 | A4IE36  | E9BV14 |
| eNOS          | E9AZU3 | Q4Q8E2 | A4HGH1 | A4I3K3  | E9BJK6 |
| PP2A          | E9AUK9 | Q4QCX5 | E9AIC2 | A4HYP6  | E9BEL9 |
| Cyclin        | E9B3B5 | Q4Q4U0 | A4HE79 | A4I8F7  | E9BPA2 |
| CDK           | E9ASH4 | O96526 | A4HNR5 | A4ICT0  | E9BTB9 |
| Ras           | E9AYX8 | E9AD53 | A4HFK0 | E9AHE8  | E9BIZ5 |
| Hsp90         | E9B3L2 | Q4Q4I6 | A4HL70 | E9AHM8  | E9BPW4 |
| JAK           | E9AUL5 | Q4QCW9 | --     | A4HYP1  | E9BEM5 |
| S6K1          | E9AVH4 | E9AF23 | A4HLC0 | A4HZI4  | --     |
| Gby           | E9AN88 | Q4QHD6 | --     | A4HUJ0  | E9BAC8 |
| NF-κB         | --     | Q4QAW7 | A4HD71 | E9AH25  | E9BGM5 |
| ERK           | --     | Q4Q449 | A4HLJ9 | A4I9I0  | E9BQ78 |
| PI3K-Class IB | E9APJ6 | E9AE04 | A4HDR3 | --      | --     |
| PI3K-Class IA | --     | --     | --     | A4HVVU4 | E9BBN7 |
| SGK           | E9B6S9 | Q9GNR4 | A4HN71 | --      | --     |
| eIF4E         | --     | Q4QD60 | A4HA98 | A4HYH8  | --     |
| ECM           | --     | --     | A4HBI8 | E9AHT7  | E9BPZ2 |
| c-myb         | --     | --     | A4H921 | --      |        |
| ACTG1         | E9AKA4 | Q9U1E8 | A4H438 | A4HSC2  | E9B890 |
| NFKBIA        | E9B1A1 | Q4QAW7 | A4HD71 | A4I6I0  | E9BM74 |
| CYC           | E9AQU2 | Q4QEN5 | A4H8R0 | A4HX29  | E9BCZ1 |
| MAP2K1        | E9ASK6 | Q4Q1Z0 | A4HNU6 | A4ICP8  | E9BTF2 |
| AKT3          | E9ARP5 | Q27687 | A4H9L8 | A4HXY2  | E9BDT9 |
| EIF2S1        | E9AJY2 | E9ACP3 | A4H3R0 | A4HRY4  | E9B7W6 |
| TUBA1A        | E9AP62 | Q4QGC5 | A4H727 | E9AGK7  | E9BBA8 |
| MAP3K5        | E9B179 | Q4Q6Y5 | A4HIN9 | A4I5Y6  | E9BM52 |
| CAPN1         | E9B1J6 | Q4Q6L7 | A4HJ24 | A4I6E6  | E9BMH1 |
| ATM           | E9AJH9 | E9AC86 | A4H3A6 | A4HRL5  | E9B7F7 |
| CTSB          | E9ALZ5 | E9ADT5 | A4HH90 | A4I4D6  | E9BKN2 |
| ENDOG         | E9AN71 | Q4QHF4 | A4H653 | A4HUH3  | E9BAB1 |
| CTSF          | E9AMH7 | Q4QI68 | A4H5E5 | A4H5E6  | Q7K8Z6 |
| PTPN13        | E9ATX2 | Q4Q0M4 | A4HQ52 | A4IDV1  | E9BUR8 |
| EIF2AK3       | E9B501 | Q4Q2Y5 | A4HAS7 | A4I9Y7  | E9BQZ0 |
| ACTB          | E9AKA4 | Q9U1E8 | A4H438 | A4HSC2  | E9B890 |
| IKKA          | E9AV60 | --     | --     | --      | --     |
| IKKB          | E9AUN4 | Q4QCV0 | --     | A4HRW6  | E9BEP4 |

|      |        |        |        |        |        |
|------|--------|--------|--------|--------|--------|
| APAF | E9AX72 | --     | --     | --     | --     |
| XIAP | E9ATG5 | Q4QBN7 | A4HPQ0 | A4ID13 | E9BUB0 |

For the following tables (S2 to S8) these are the conventions used to name the columns:

**GMQE:** Accuracy of the tertiary structure of the model (from 0 to 1)

**QMEAN:** Metric to measure the quality of the model (> -4.0 are better models)

**COV:** Coverage of the alignment with the template

**ID:** Percentage of identity with the template

**RES:** Resolution of the crystal template

**Ligands:** Ligands co-crystallized in the template

**fpocket:** Pocket chosen by the fpocket tool to score the druggability

**DS:** Druggability score

**Table S2.** Summary of the modelling variables and the druggability score for the CDK kinases detected in the five species of *Leishmania* analysed.

| UniProt ID | PDB template | GMQE | QMEAN | COV  | ID    | RES   | Ligands | fpocket   | DS    |
|------------|--------------|------|-------|------|-------|-------|---------|-----------|-------|
| A4HNR5     | 6gu6.1.A     | 0,78 | -1,52 | 0,93 | 55,9  | 2,33A | 1QK     | pocket 1  | 0,727 |
|            | 6gu7.2.A     | 0,77 | -2,38 | 0,93 | 55,9  | 2,75A | None    | pocket 1  | 0,829 |
|            | 1h1p.2.A     | 0,77 | -1,88 | 0,94 | 59,45 | 2,10A | CMG     | pocket 1  | 0,687 |
|            |              |      |       |      |       |       |         | pocket 11 |       |
| O96526     | 6gu6.1.A     | 0,77 | -1,53 | 0,93 | 54,86 | 2,33A | 1QK     |           | 0,721 |
|            | 6gu7.2.A     | 0,77 | -2,41 | 0,93 | 54,86 | 2,75A | None    | pocket 1  | 0,775 |
|            | 1h1p.2.A     | 0,77 | -1,85 | 0,94 | 59,11 | 2,10A | CMG     | pocket 1  | 0,664 |
|            | 6gu6.1.A     | 0,77 | -1,95 | 0,93 | 55,21 | 2,33A | 1QK     | pocket 1  | 0,678 |
| E9ASH4     | 6gu7.2.A     | 0,77 | -2,36 | 0,93 | 55,21 | 2,75A | None    | pocket 1  | 0,775 |
|            | 1h1p.2.A     | 0,77 | -1,77 | 0,94 | 59,11 | 2,10A | CMG     | pocket 1  | 0,687 |
|            | 1h24.2.A     | 0,76 | -2,13 | 0,94 | 59,11 | 2,50A | None    | pocket 1  | 0,764 |
|            | 6gu6.1.A     | 0,77 | -1,53 | 0,93 | 55,21 | 2,33A | 1QK     | pocket 2  | 0,627 |
| A4ICT0     | 6gu7.2.A     | 0,77 | -2,36 | 0,93 | 55,21 | 2,75A | None    | pocket 1  | 0,775 |
|            | 1h1p.2.A     | 0,77 | -1,76 | 0,94 | 59,11 | 2,10A | CMG     | pocket 1  | 0,687 |
|            | 6gu6.1.A     | 0,77 | -1,53 | 0,93 | 55,21 | 2,33A | 1QK     | pocket 2  | 0,627 |
| E9BTB9     | 1h1p.2.A     | 0,77 | -1,76 | 0,94 | 59,11 | 2,10A | CMG     | pocket 1  | 0,687 |

**Table S3.** Summary of the modelling variables and the druggability score for the AKT kinases detected in the five species of *Leishmania* analysed.

| UniProt ID | PDB template | GMQE | QMEAN | COV  | ID    | RES   | Ligands  | fpocket  | DS    |
|------------|--------------|------|-------|------|-------|-------|----------|----------|-------|
| A4H9L8     | 4wb5.1.A     | 0,77 | -0,51 | 0,95 | 52,06 | 1,64A | ATP - MG | pocket 1 | 0,509 |
|            | 6ccy.1.A     | 0,74 | -2,11 | 0,97 | 40,81 | 2,18A | EX4      | pocket 2 | 0,697 |
|            | 4wb8.1.A     | 0,77 | -0,45 | 0,95 | 51,75 | 1,55A | ATP - MG | pocket 1 | 0,769 |
| Q27687     | 6ccy.1.A     | 0,74 | -2,35 | 0,97 | 41,12 | 2,18A | EX4      | pocket 2 | 0,704 |
|            | 4wb8.1.A     | 0,77 | -0,47 | 0,95 | 51,9  | 1,55A | ATP - MG | pocket 1 | 0,759 |
|            | 6ccy.1.A     | 0,74 | -2,31 | 0,98 | 39,51 | 2,18A | EX4      | pocket 1 | 0,592 |
| E9ARP5     | 4wb5.1.A     | 0,77 | -0,51 | 0,95 | 51,43 | 1,64A | ATP - MG | pocket 2 | 0,809 |
|            | 1fot.1.A     | 0,74 | -2,7  | 0,95 | 50    | 2,80A | None     | pocket 1 | 0,765 |
|            | 4wb8.1.A     | 0,77 | -0,56 | 0,95 | 51,27 | 1,55A | ATP - MG | pocket 1 | 0,737 |
| A4HXY2     | 4wb5.1.A     | 0,77 | -0,51 | 0,95 | 51,43 | 1,64A | ATP - MG | pocket 2 | 0,809 |
|            | 1fot.1.A     | 0,74 | -2,7  | 0,95 | 50    | 2,80A | None     | pocket 1 | 0,765 |
|            | E9BDT9       | 0,74 | -2,7  | 0,95 | 50    | 2,80A | None     | pocket 1 | 0,765 |

**Table S4.** Summary of the modelling variables and the druggability score for the ATM kinases detected in the five species of *Leishmania* analysed.

| UniProt ID | PDB template | GMQE | QMEAN | COV  | ID    | RES   | Ligands  | fpocket   | DS    |
|------------|--------------|------|-------|------|-------|-------|----------|-----------|-------|
| A4H3A6     | 4jsn.1.A     | 0,03 | -4,28 | 0,12 | 23,54 | 3,20A | None     | pocket 2  | 0,509 |
| E9AC86     | 4jsn.1.A     | 0,03 | -3,59 | 0,11 | 23,77 | 3,20A | None     | pocket 1  | 0,825 |
| E9AJH9     | 4jsn.1.A     | 0,03 | -3,63 | 0,11 | 23,71 | 3,20A | None     | pocket 11 | 0,865 |
| A4HRL5     | 4jsp.1.A     | 0,03 | -4,59 | 0,11 | 24,13 | 3,30A | AGS - MG | pocket 4  | 0,765 |
| E9B7F7     | 4jsn.1.A     | 0,03 | -4,15 | 0,11 | 24,09 | 3,20A | None     | pocket 1  | 0,587 |

**Table S5.** Summary of the modelling variables and the druggability score for the AMPK kinases detected in the five species of *Leishmania* analysed.

| UniProt ID | PDB template | GMQE | QMEAN | COV  | ID    | RES   | Ligands         | fpocket  | DS    |
|------------|--------------|------|-------|------|-------|-------|-----------------|----------|-------|
| A4HHK1     | 5ezv.1.A     | 0,31 | -0,96 | 0,4  | 52,94 | 2,99A | C1V - C2Z - STU | pocket 1 | 0,57  |
|            | 2hak.6.A     | 0,27 | -2,72 | 0,39 | 40,82 | 2,60A | None            | pocket 6 | 0,821 |
|            | 5ezv.1.A     | 0,31 | -0,85 | 0,4  | 53,4  | 2,99A | C1V - C2Z - STU | pocket 2 | 0,563 |
| E9AE64     | 5iso.1.A     | 0,3  | -1,47 | 0,4  | 53,73 | 2,63A | AMP - STU - 992 | pocket 1 | 0,485 |
| E9ALM1     | 6blu.2.A     | 0,31 | -1,39 | 0,4  | 52,94 | 2,77A | AMP- CG7 - STU  | pocket 1 | 0,725 |

|        |          |      |       |      |       |       |                      |          |       |
|--------|----------|------|-------|------|-------|-------|----------------------|----------|-------|
|        | 2hak.6.A | 0,27 | -2,79 | 0,39 | 41,64 | 2,60A | None                 | pocket 6 | 0,576 |
|        | 4ynz.1.B | 0,26 | -2,01 | 0,39 | 41,77 | 2,00A | None                 | pocket 5 | 0,524 |
|        | 2hak.6.A | 0,26 | -2,86 | 0,39 | 41,77 | 2,60A | None                 | pocket 6 | 0,526 |
| A4I4Q9 |          |      |       |      |       |       | IMD – AMP<br>– CG7 - |          |       |
|        | 6blu.2.A | 0,31 | -1,4  | 0,4  | 53,25 | 2,77A | STU                  | pocket 1 | 0,725 |
|        |          |      |       |      |       |       | IMD – AMP<br>– CG7 - |          |       |
|        | 6blu.2.A | 0,31 | -1,4  | 0,4  | 53,25 | 2,77A | STU                  | pocket 1 | 0,725 |
|        |          |      |       |      |       |       | C1V – C2Z -          |          |       |
|        | 5ezv.1.A | 0,3  | -1,76 | 0,4  | 53,25 | 2,99A | STU                  | pocket 1 | 0,576 |
| E9BL11 | 4yom.1.A | 0,27 | -2,52 | 0,39 | 38,32 | 2,49A | EDO                  | pocket 2 | 0,55  |

**Table S6.** Summary of the modelling variables and the druggability score for the mTOR kinases detected in the five species of *Leishmania* analysed.

| UniProt ID | PDB template | GMQE | QMEAN | COV  | ID    | RES   | Ligands | fpocket   | DS    |
|------------|--------------|------|-------|------|-------|-------|---------|-----------|-------|
|            | 4jsn.1.A     | 0,29 | -3,73 | 0,44 | 38,33 | 3,20A | None    | pocket 1  | 0,465 |
| A4HBF9     | 5wbu.1.A     | 0,29 | -3,71 | 0,44 | 36,3  | 3,42A | None    | pocket 49 | 0,742 |
| Q4Q0C8     | 4jsn.1.A     | 0,26 | -3,71 | 0,42 | 38,39 | 3,20A | None    | pocket 9  | 0,532 |
| E9AU66     | 4jsn.1.A     | 0,26 | -3,73 | 0,42 | 38,48 | 3,20A | None    | pocket 1  | 0,643 |
| A4IE36     | 4jsn.1.A     | 0,25 | -3,72 | 0,42 | 38,42 | 3,20A | None    | pocket 11 | 0,658 |
| E9BV14     | 4jsn.1.A     | 0,26 | -3,71 | 0,42 | 38,33 | 3,20A | None    | pocket 9  | 0,584 |

**Table S7.** Summary of the modelling variables and the druggability score for the GSK3 kinases detected in the five species of *Leishmania* analysed.

| UniProt ID | PDB template | GMQE | QMEAN | COV  | ID    | RES   | Ligands   | fpocket  | DS    |
|------------|--------------|------|-------|------|-------|-------|-----------|----------|-------|
|            | 3e3p.1.A     | 0,94 | -0,58 | 1    | 93,52 | 2,00A | None      | pocket 2 | 0,625 |
| A4H9D1     | 3sd0.1.B     | 0,72 | -2,72 | 0,9  | 50,16 | 2,70A | EPE - TSK | pocket 1 | 0,606 |
|            | 3e3p.1.A     | 0,97 | -0,25 | 1    | 100   | 2,00A | None      | pocket 2 | 0,658 |
| Q4QE15     | 3sd0.1.B     | 0,72 | -1,81 | 0,9  | 49,53 | 2,70A | EPE - TSK | pocket 1 | 0,628 |
|            | 3e3p.1.A     | 0,96 | -0,61 | 1    | 96,9  | 2,00A | None      | pocket 3 | 0,53  |
| E9ARG4     | 3sd0.1.B     | 0,72 | -2,13 | 0,9  | 49,53 | 2,70A | EPE - TSK | pocket 2 | 0,436 |
|            | 3e3p.1.A     | 0,97 | -0,41 | 1    | 98,03 | 2,00A | None      | pocket 2 | 0,658 |
| A4HXQ3     | 5f94.1.A     | 0,73 | -2,82 | 0,91 | 49,23 | 2,51A | 3UO       | pocket 1 | 0,788 |
|            | 3e3p.1.A     | 0,97 | -0,43 | 1    | 98,31 | 2,00A | None      | pocket 2 | 0,658 |
| E9BDK8     | 3sd0.1.A     | 0,72 | -2,18 | 0,9  | 49,84 | 2,70A | EPE - TSK | pocket 1 | 0,579 |



**Table S8.** Summary of the modelling variables and the druggability score for the PI3K kinases detected in the five species of *Leishmania* analysed.

| UniProt ID | PDB template | GMQE | QMEAN | COV  | ID    | RES   | Ligands       | fpocket   | DS    |
|------------|--------------|------|-------|------|-------|-------|---------------|-----------|-------|
| A4HDR3     | 5dfz.1.B     | 0,47 | -5,83 | 0,71 | 27,6  | 4,40A | None<br>EFV - | pocket 1  | 0,837 |
|            | 6cls.1.A     | 0,08 | -3,4  | 0,2  | 25,29 | 2,31A | SO4           | pocket 1  | 0,836 |
| E9AE04     | 4bfr.1.A     | 0,08 | -3,16 | 0,19 | 23,64 | 2,80A | J82           | pocket 5  | 0,818 |
|            | 4l1b.1.A     | 0,63 | -3,92 | 0,92 | 32,14 | 2,59A | SO4           | pocket 35 | 0,565 |
| E9APJ6     | 4bfr.1.A     | 0,61 | -4,05 | 0,93 | 32,68 | 2,80A | J82           | pocket 1  | 0,534 |
| A4HVVU4    | 6eyz.1.A     | 0,58 | -3,96 | 0,88 | 31,31 | 2,20A | C5W           | pocket 17 | 0,92  |
| E9BBN7     | 5ae9.1.A     | 0,56 | -3,72 | 0,84 | 28,17 | 2,44A | OKO           | pocket 17 | 0,53  |

**Table S9.** List of best 20 compounds per kinase model based on the AutoDock Vina score [Attached xlsx file].

**Table S10.** Full list of compounds IDs and SMILES representations of their chemical structures. [Attached xlsx file].

## Supplementary Text

### S1. Details of other proteins detected from the PI3K/AKT pathway mapping

#### S1.1 14-3-3

The highly conserved, multifunctional phospho-serine/phospho-threonine binding proteins 14-3-3 have two roles in apoptosis: increases the tumour suppressor p53 activity to induce the transcription of pro-apoptotic genes such as *bad* [1] but also alter pro-apoptotic proteins (BAD, Bax, FOXO and Ask1) subcellular location to block their activation [2]. 14-3-3 proteins act as chaperones also for other proteins like Raf-1, involved in cell proliferation and survival [2]. Several small molecules identified as 14-3-3 inhibitors, reviewed in [1], have been assayed as drug candidates in cancer therapy. Recently, a novel series of specific sphingosine-like compounds able to induce mitochondrial apoptosis *in vitro* and reduce tumour growth *in vivo* by disrupting 14-3-3 dimerization has been reported [3].

#### S1.2 Eukaryotic translation initiation factor- eIF4E

In eukaryotes initiation of cap-dependent translation relies on the small ribosome subunit recruitment to the 5' end of the mRNA (denoted cap4 in trypanosomatids) which is facilitated by eIF4F complex. eIF4F consists of a small cap-binding protein, eIF4E, an ATP-dependent RNA helicase, eIF4A, and a large scaffold protein, eIF4G. In their hypophosphorylated state, 4E-BPs act as competitive inhibitors of eIF4F complex formation. When activated through PI3K/AKT pathway, mTOR phosphorylates 4E-BP and eIF4G, releasing eIF4E, allowing for eIF4F complex formation and therefore increasing cap dependent translation. In the field of cancer, eIF4F complex has been proposed as a therapeutic target because growth-related and anti-apoptotic proteins are encoded by

structurally complex mRNAs which have a high requirement for eIF4F[4]. Compounds that impede eIF4E–eIF4G complex formation (4EGI-1) suppressed the growth and induced apoptosis in several types of cancer[5].

### **S1.3 Heat Shock Protein-Hsp90**

Inhibition of the molecular chaperone Hsp90 induces cell cycle arrest and apoptosis as it causes the simultaneous degradation of different client proteins involved in all levels of cell signalling [6]. Hsp90 and other chaperones function as survival factors, particularly under stress conditions, e.g., prevents procaspase-9 recruitment to the apoptosome by binding Apaf-1 [7]; stabilizes and protects AKT from phosphatase 2A (PP2A) dephosphorylation, hence inhibiting apoptosis [8].

### **S1.4 C-myb**

C-myb is a highly conserved DNA binding transcriptional regulator that controls the expression of certain genes related to cell proliferation, differentiation and development [9]. C-myb also activates the expression of pro-survival proteins such as Bcl-X<sub>L</sub> [10,11]. There are studies reporting c-myb disruption as an inducer of apoptosis in tumorigenic cells by inhibiting AKT pathway activation [12].

### **S1.5 JAK**

The Janus kinase (JAK) is the physiological activator of the signal transducer and activator of transcription 3 (STAT3). When activated, STAT3 may play a role in apoptosis by increasing the expression of proteins like survivin, a member of the Inhibitors of Apoptosis (IAP) or repressing the expression of the pro-apoptotic factor p53 that up-regulates proteins like APAF1, caspase 6 and FAS [13]. Specific inhibition of JAK2 (i.e.: AG490 or AZD1480) has been correlated with increase in apoptosis as associated with lower expression of the proteins Bcl-X<sub>L</sub> and Bcl-2 [14] [15]. More importantly, there are JAK inhibitors already approved for human use (Ruxolitinib and Tofacitinib) and many others are undergoing clinical trials.

### **S1.6 NF-κB**

Nuclear factor of  $\kappa$ B (NF- $\kappa$ B) is a family of transcription factors activators of several genes that promote cell proliferation (cyclins and growth factors) or block programmed cell death (cIAPS, cFLIP, Bfl-1, Bcl-2, and Bcl-xl) [16]. Numerous inhibitors of NF- $\kappa$ B have shown to block proliferation or render tumour cells more sensitive to apoptosis-inducing agents, however none has yet been approved for human use [17].

### **S1.7 S6 kinase**

S6 serine/threonine kinase is a downstream effector of mTORC1 involved in protein synthesis and cell growth. Because S6K is considered a 'junctional molecule', that is, it's a node between different signal transduction pathways, it is thought to constitute an ideal target for cancer therapy [18] but we could only find a limited number studies relating S6K and apoptosis [19,20] including one clinical phase I trial evaluating an inhibitor of S6K [21].

### **S1.8 PHLPP and PTEN**

The protein phosphatase PHLPP and the lipid phosphatase PTEN conform a tumour suppressor with synergistic effects on the control of the PI3K/AKT cascade [22]. PHLPP mediates dephosphorylation of AKT and S6 kinase, therefore promoting apoptosis, decreasing proliferation and depleting overall protein synthesis [23]. Thus, PHLPP is a potential therapeutic target to suppress oncogenic pathways [23]. On the other hand, the major function of PTEN is dephosphorylation of PtdIns (3,4,5) regulator of AKT activation and the main product of PI3K thus antagonizing its biological action [24]. In addition, promising studies *in vitro* have identified several regulatory mechanisms to modulate PTEN activity [24]. Interestingly, cell migration, invasion and adhesion have been listed as other functions of PTEN [25]. We found no studies reporting either of these proteins in *Leishmania*.

## **S2. Role of other proteins detected in the PI3K/AKT homologue pathway in *Leishmania* spp.**

Regarding other proteins within the PI3K/AKT survival pathway, we found that 14-3-3 was recently reported in *L. infantum* and is thought to be a virulence factor for prolonging the life

span of the host cell [26]. A study has linked 14-3-3 with drug-induced cell death in *Leishmania* [27].

As for eIF4E, four isoforms have been described in *Leishmania*, denoted LeishIF4E-1 through LeishIF4E-4. Nonetheless, little is known of their biological functions. LeishIF4E-1 would be functional during thermal stress [28], LeishIF4E-3 is located in stress granules together with inactive mRNAs during nutritional deprivation and LeishIF4E-4 complex engages in the translation initiation process in promastigotes [28]. Hsp90 (a.k.a Hsp83) is one of the most abundant proteins in *Leishmania*. In *L. donovani*, the Hsp90 complex has an essential role in drug resistance, proliferation and survival in both extra and intracellular forms of the parasite [29]. Pharmacological inhibition of *Leishmania* Hsp90 with specific inhibitors as geldanamycin, radicicol [30] and 17-AAG [31] affects transformation of promastigotes into amastigotes and halts intracellular proliferation of amastigotes in *ex vivo* macrophages. The binding motif to Hsp90, PxxP is conserved in *Leishmania* AKT-like AGC domain and probably the molecular mechanism underlying both proteins interaction and function is conserved in *Leishmania*.

It is important to clarify that some of these proteins associated to the PI3K-AKT pathway have not being previously reported as *Leishmania* homologous. For example, a myb-like domain has been described as part of telomere binding proteins in *L. amazonensis*, but no c-myb [32]. In our data, c-myb is exclusively present in *L. braziliensis*. Other one is NF- $\kappa$ B, which had not been described in *Leishmania* but was detected by our method. To the best of our knowledge, none of the several thousand of the existing NF- $\kappa$ B inhibitors have been evaluated as potential anti-*Leishmania* compounds. S6K1 had not been previously reported in *Leishmania* but its major substrate, ribosomal S6 component of the 40S subunit, was cloned in *L. infantum* (LiS6). LiS6 sequence shows common features with that in eukaryotes but differs in key regulatory phosphorylation sites which might affect its function in the parasite [33].

### **S3. Apoptosis-like potential effectors in *Leishmania* spp.**

Except for Raf, we found three out of four members of the Ras/Raf-MEK-/MAPK-ERK pathway. This signal transduction pathway is present in all eukaryotes, regulates the gene expression and activity of many proteins involved in control of cell division, growth, proliferation or apoptosis. A putative MEK (named MRK1 for MEK-related kinase) was identified in *L. major* [34] and at least 15 putative genes for MAPKs are codified in the *L. major*, *L. mexicana*, *L. infantum* y *L. braziliensis* genome [35]; these are required for flagellar development, intracellular survival and viability [36]. As for the Ras or Rho subfamilies though present, are highly divergent [37]. Mitogenic Ras/MAPK and survival PI3K/AKT pathways overlap at several nodes (being BAD an essential one [38]) determining cell fate, as a result, their simultaneous blockade it is being explored in cancer [39]. These cascades regulate each other in a context-dependent manner via cross-inhibition (with the involvement of *Leishmania* homologs 14-3-3, PP2A or AKT) and cross-activation. More details on this topic can be found in [40,41]. Due to their reciprocal regulation, and the activation of compensatory signaling, Ras/MAPK stands as an important pathway when considering apoptosis induction as leishmaniasis therapy.

In metazoans, mitochondria dysfunction is a main activator of apoptosis. During intrinsic cell death Bcl-2 members are responsible for mitochondrial outer membrane permeabilization, hence releasing pro-apoptotic factors, like cytochrome C into the cytosol. To the best of our knowledge none of the pro-apoptotic Bcl-2 members BAX, BAD, BAK, or BID have been reported in *Leishmania*, and were not retrieved in our *in silico* search. However, functional homologous of Bax might be present in *Leishmania* [42]. On the other hand, although we did not find BAD, we retrieved its inhibitors AKT, 14-3-3 and S6K1 and its activator, calpain, while other studies further support the existence of BH3 bearing proteins [43]. Pro-apoptotic cytochrome c binds in the cytosol to several molecules of Apaf-1; this protein complex known as apoptosome activates the initiator caspase 9. Several species of *Leishmania* are known to secrete cytochrome c upon apoptotic stimuli [44]. A homologue of Apaf-1 protein has been previously described *in silico* [45]; we further identified homologues in *L. major*, *L. braziliensis*, and *L. donovani*.

## References

- 1 Aghazadeh Y, Papadopoulos V. The Role of the 14-3-3 Protein Family in Health, Disease, and Drug Development. *Drug Discov. Today* 2016; **21**: 278–287; DOI:10.1016/j.drudis.2015.09.012.
- 2 Muslin AJ, Xing H. 14-3-3 Proteins: Regulation of Subcellular Localization by Molecular Interference. *Cell. Signal.* 2000; **12**: 703–709.
- 3 Woodcock JM, Coolen C, Goodwin KL, Baek DJ, Bittman R, Samuel MS, Pitson SM, Lopez AF. Destabilisation of Dimeric 14-3-3 Proteins as a Novel Approach to Anti-Cancer Therapeutics. *Oncotarget* 2015; **6**: 14522–14536; DOI:10.18632/oncotarget.3995.
- 4 Walsh D. Manipulation of the Host Translation Initiation Complex EIF4F by DNA Viruses. *Biochem. Soc. Trans.* 2010; **38**: 1511–1516; DOI:10.1042/BST0381511.
- 5 Siddiqui N, Sonenberg N. Signalling to EIF4E in Cancer. *Biochem. Soc. Trans.* 2015; **43**.
- 6 Maloney A, Workman P. HSP90 as a New Therapeutic Target for Cancer Therapy: The Story Unfolds. *Expert Opin. Biol. Ther.* 2002; **2**: 3–24; DOI:10.1517/14712598.2.1.3.
- 7 Kurokawa M, Zhao C, Reya T, Kornbluth S. Inhibition of Apoptosome Formation by Suppression of Hsp90beta Phosphorylation in Tyrosine Kinase-Induced Leukemias. *Mol. Cell. Biol.* 2008; **28**: 5494–5506; DOI:10.1128/MCB.00265-08.
- 8 Sato S, Fujita N, Tsuruo T. Modulation of Akt Kinase Activity by Binding to Hsp90. *Proc. Natl. Acad. Sci. U. S. A.* 2000; **97**: 10832–10837; DOI:10.1073/pnas.170276797.
- 9 Oh I-H, Reddy EP. The Myb Gene Family in Cell Growth, Differentiation and Apoptosis. *Oncogene* 1999; **18**: 3017–3033; DOI:10.1038/sj.onc.1202839.
- 10 Huang Y, Jiang Y, Lu W, Zhang Y. Nemo-like Kinase Associated with Proliferation and Apoptosis by c-Myb Degradation in Breast Cancer. *PLoS One* 2013; **8**: e69148; DOI:10.1371/journal.pone.0069148.
- 11 Ramsay RG, Barton AL, Gonda TJ. Targeting C-Myb Expression in Human Disease. *Expert Opin. Ther. Targets* 2003; **7**: 235–248; DOI:10.1517/14728222.7.2.235.
- 12 Kim SY, Yang YS, Hong KH, Jang KY, Chung MJ, Lee DY, Lee JC, Yi HK, Nam S-Y, Hwang PH. Adenovirus-Mediated Expression of Dominant Negative c-Myb

- Induces Apoptosis in Head and Neck Cancer Cells and Inhibits Tumor Growth in Animal Model. *Oral Oncol.* 2008; **44**: 383–392; DOI:10.1016/j.oraloncology.2007.05.004.
- 13 Al Zaid Siddiquee K, Turkson J. STAT3 as a Target for Inducing Apoptosis in Solid and Hematological Tumors. *Cell Res.* 2008; **18**: 254–267; DOI:10.1038/cr.2008.18.
  - 14 Xiong H, Zhang Z-G, Tian X-Q, Sun D-F, Liang Q-C, Zhang Y-J, Lu R, Chen Y-X, Fang J-Y. Inhibition of JAK1, 2/STAT3 Signaling Induces Apoptosis, Cell Cycle Arrest, and Reduces Tumor Cell Invasion in Colorectal Cancer Cells. *Neoplasia* 2008; **10**: 287–297.
  - 15 Stuart E, Buchert M, Putoczki T, Thiem S, Farid R, Elzer J, Huszar D, Waring PM, Pheese TJ, Ernst M. Therapeutic Inhibition of Jak Activity Inhibits Progression of Gastrointestinal Tumors in Mice. *Mol. Cancer Ther.* 2014; **13**: 468–474; DOI:10.1158/1535-7163.MCT-13-0583-T.
  - 16 Karin M, Cao Y, Greten FR, Li Z-W. NF-KappaB in Cancer: From Innocent Bystander to Major Culprit. *Nat. Rev. Cancer* 2002; **2**: 301–310; DOI:10.1038/nrc780.
  - 17 Gupta SC, Sundaram C, Reuter S, Aggarwal BB. Inhibiting NF-KB Activation by Small Molecules as a Therapeutic Strategy. *Biochim. Biophys. Acta* **1799**: 775–787; DOI:10.1016/j.bbagr.2010.05.004.
  - 18 Zhao XF, Gartenhaus RB. Phospho-P70S6K and Cdc2/Cdk1 as Therapeutic Targets for Diffuse Large B-Cell Lymphoma. *Expert Opin. Ther. Targets* 2009; **13**: 1085–1093; DOI:10.1517/14728220903103833.
  - 19 Choi H-N, Jin H-O, Kim J-H, Hong S-E, Kim H-A, Kim E-K, Lee JK, Park I-C, Noh WC. *Inhibition of S6K1 Enhances Glucose Deprivation-Induced Cell Death via Downregulation of Anti-Apoptotic Proteins in MCF-7 Breast Cancer Cells*, Vol. 432. 2013; DOI:10.1016/j.bbrc.2013.01.074.
  - 20 Sridharan S, Basu A. S6 Kinase 2 Promotes Breast Cancer Cell Survival via Akt. *Cancer Res.* 2011; **71**: 2590–2599; DOI:10.1158/0008-5472.CAN-10-3253.
  - 21 Qiu Z-X, Sun R-F, Mo X-M, Li W-M. The P70S6K Specific Inhibitor PF-4708671 Impedes Non-Small Cell Lung Cancer Growth. *PLoS One* 2016; **11**: e0147185; DOI:10.1371/journal.pone.0147185.



- 22 Molina JR, Agarwal NK, Morales FC, Hayashi Y, Aldape KD, Cote G, Georgescu M-M. PTEN, NHERF1 and PHLPP Form a Tumor Suppressor Network That Is Disabled in Glioblastoma. *Oncogene* 2012; **31**: 1264–1274; DOI:10.1038/onc.2011.324.
- 23 Newton AC, Trotman LC. Turning off AKT: PHLPP as a Drug Target. *Annu. Rev. Pharmacol. Toxicol.* 2014; **54**: 537–558; DOI:10.1146/annurev-pharmtox-011112-140338.
- 24 Chalhoub N, Baker SJ. PTEN and the PI3-Kinase Pathway in Cancer. *Annu. Rev. Pathol.* 2009; **4**: 127–150; DOI:10.1146/annurev.pathol.4.110807.092311.
- 25 Yamada KM, Araki M. Tumor Suppressor PTEN: Modulator of Cell Signaling, Growth, Migration and Apoptosis. *J. Cell Sci.* 2001; **114**: 2375–2382.
- 26 da Fonseca Pires S, Fialho LC, Silva SO, Melo MN, de Souza CC, Tafuri WL, Bruna Romero O, de Andrade HM. Identification of Virulence Factors in Leishmania Infantum Strains by a Proteomic Approach. *J. Proteome Res.* 2014; **13**: 1860–1872; DOI:10.1021/pr400923g.
- 27 Vergnes B, Gourbal B, Girard I, Sundar S, Drummelsmith J, Ouellette M. A Proteomics Screen Implicates HSP83 and a Small Kinetoplastid Calpain-Related Protein in Drug Resistance in Leishmania Donovanii Clinical Field Isolates by Modulating Drug-Induced Programmed Cell Death. *Mol. Cell. Proteomics* 2006; **6**: 88–101; DOI:10.1074/mcp.M600319-MCP200.
- 28 Zinoviev A, Manor S, Shapira M. Nutritional Stress Affects an Atypical Cap-Binding Protein in Leishmania. *RNA Biol.* 2012; **9**: 1450–1460; DOI:10.4161/rna.22709.
- 29 Hombach A, Clos J. No Stress--Hsp90 and Signal Transduction in Leishmania. *Parasitology* 2014; **141**: 1156–1166; DOI:10.1017/S0031182013002151.
- 30 Wiesgigl M, Clos J. Heat Shock Protein 90 Homeostasis Controls Stage Differentiation in Leishmania Donovanii. *Mol. Biol. Cell* 2001; **12**: 3307–3316; DOI:10.1091/MB.12.11.3307.
- 31 Petersen AL de OA, Guedes CES, Versoza CL, Lima JGB, de Freitas LAR, Borges VM, Veras PST, Desjeux P, Kedzierski L, Zhu Y, et al.. 17-AAG Kills Intracellular Leishmania Amazonensis While Reducing Inflammatory Responses in Infected

- Macrophages. *PLoS One* 2012; **7**: e49496; DOI:10.1371/journal.pone.0049496.
- 32 Lira CBB, de Siqueira Neto JL, Khater L, Cagliari TC, Peroni LA, dos Reis JRR, Ramos CHI, Cano MIN. LaTBP1: A *Leishmania Amazonensis* DNA-Binding Protein That Associates in Vivo with Telomeres and GT-Rich DNA Using a Myb-like Domain. *Arch. Biochem. Biophys.* 2007; **465**: 399–409; DOI:10.1016/j.abb.2007.06.020.
- 33 Gonzalez-Aseguinolaza G, Taladriz S, Marquet A, Larraga V. Cloning and Structural Analysis of the Gene Encoding the Ribosomal Protein S6 from the Parasite *Leishmania Infantum*. *Biochem. Biophys. Res. Commun.* 1998; **248**: 464–468; DOI:10.1006/bbrc.1998.8927.
- 34 Agron PG, Reed SL, Engel JN. An Essential, Putative MEK Kinase of *Leishmania Major*. *Mol. Biochem. Parasitol.* 2005; **142**: 121–125; DOI:10.1016/j.molbiopara.2005.03.007.
- 35 Wiese M. *Leishmania* MAP Kinases--Familiar Proteins in an Unusual Context. *Int. J. Parasitol.* 2007; **37**: 1053–1062; DOI:10.1016/j.ijpara.2007.04.008.
- 36 Cayla M, Rachidi N, Leclercq O, Schmidt-Arras D, Rosenqvist H, Wiese M, Späth GF. Transgenic Analysis of the *Leishmania* MAP Kinase MPK10 Reveals an Auto-Inhibitory Mechanism Crucial for Stage-Regulated Activity and Parasite Viability. *PLoS Pathog.* 2014; **10**: e1004347; DOI:10.1371/journal.ppat.1004347.
- 37 Field MC. Signalling the Genome: The Ras-like Small GTPase Family of Trypanosomatids. *Trends Parasitol.* 2005; **21**: 447–450; DOI:10.1016/j.pt.2005.08.008.
- 38 Fang X, Yu S, Eder A, Mao M, Bast RC, Boyd D, Mills GB. Regulation of BAD Phosphorylation at Serine 112 by the Ras-Mitogen-Activated Protein Kinase Pathway. *Oncogene* 1999; **18**: 6635–6640; DOI:10.1038/sj.onc.1203076.
- 39 Chappell WH, Steelman LS, Long JM, Kempf RC, Abrams SL, Franklin RA, Bäsecke J, Stivala F, Donia M, Fagone P, Malaponte G, Mazzarino MC, Nicoletti F, Libra M, Maksimovic-Ivanic D, Mijatovic S, Montalto G, Cervello M, Laidler P, Milella M, Tafuri A, Bonati A, Evangelisti C, Cocco L, Martelli AM, McCubrey JA. Ras/Raf/MEK/ERK and PI3K/PTEN/Akt/MTOR Inhibitors: Rationale and Importance to Inhibiting These Pathways in Human Health. *Oncotarget* 2011; **2**:

- 135–164; DOI:10.18632/oncotarget.240.
- 40 Aksamitiene E, Kiyatkin A, Kholodenko BN. Cross-Talk between Mitogenic Ras/MAPK and Survival PI3K/Akt Pathways: A Fine Balance. *Biochem. Soc. Trans.* 2012; **40**: 139–146; DOI:10.1042/BST20110609.
  - 41 Mendoza MC, Er EE, Blenis J. The Ras-ERK and PI3K-MTOR Pathways: Cross-Talk and Compensation. *Trends Biochem. Sci.* 2011; **36**: 320–328; DOI:10.1016/j.tibs.2011.03.006.
  - 42 Arnoult D, Akarid K, Grodet A, Petit PX, Estaquier J, Ameisen JC. On the Evolution of Programmed Cell Death: Apoptosis of the Unicellular Eukaryote *Leishmania* Major Involves Cysteine Proteinase Activation and Mitochondrion Permeabilization. *Cell Death Differ.* 2002; **9**: 65–81; DOI:10.1038/sj.cdd.4400951.
  - 43 Alzate JF, Arias A, Mollinedo F, Rico E, de la Iglesia-Vicente J, Jiménez-Ruiz A. Edelfosine Induces an Apoptotic Process in *Leishmania Infantum* That Is Regulated by the Ectopic Expression of Bcl-XL and Hrk. *Antimicrob. Agents Chemother.* 2008; **52**: 3779–3782; DOI:10.1128/AAC.01665-07.
  - 44 Jiménez-Ruiz A, Alzate J, MacLeod E, Lüder CG, Fasel N, Hurd H, Kroemer G, Galluzzi L, Vandenabeele P, Abrams J, Alnemri E, et al. Apoptotic Markers in Protozoan Parasites. *Parasit. Vectors* 2010; **3**: 104; DOI:10.1186/1756-3305-3-104.
  - 45 Gannavaram S, Debrabant A. Programmed Cell Death in *Leishmania*: Biochemical Evidence and Role in Parasite Infectivity. *Front. Cell. Infect. Microbiol* 2012.
